# Supplementary material
Source: MDPI journal article supplement (https://www.mdpi.com/2071-1050/11/8/2449)
Supplement: s1 [file s1]

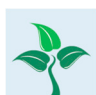

**Supplementary Table S1.** Semi-structured interview topics and example probing questions.

| Topics                       | Example probing questions                                                                                                                                                                                                                                                                                                                           |
|------------------------------|-----------------------------------------------------------------------------------------------------------------------------------------------------------------------------------------------------------------------------------------------------------------------------------------------------------------------------------------------------|
| Farm operation               | Where are you located? How many acres are part of the operation? What type of business models are involved?                                                                                                                                                                                                                                         |
| Agroforestry practices       | What is currently under production? What type of agroforestry is happening there? Why did you start this operation?                                                                                                                                                                                                                                 |
| Land access and tenure       | Why do you think the other party wanted to work with you? What type of lease do you have? How many parties are involved? How did these relationships form? What are the roles of each party in the operation? What are their responsibilities? What happens if one party wants to exit the arrangement? What type of funding do you have access to? |
| Relations with other parties | What has worked well with your arrangement? What have been learning moments? What advice would you give others considering partnering with others in agroforestry? Are you involved in any federal or state conservation programs? Are you conducting any on-farm research?                                                                         |
